# Supplementary material for: Can Mobile Phone Apps Influence People’s Health Behavior Change? An Evidence Review
Source: PubMed Central journal article supplement (PMC5295827; doi:10.2196/jmir.5692), 2016-11-02
Supplement: jmir_v18i11e287_app3.pdf [file jmir_v18i11e287_app3.pdf]

Multimedia Appendix 3: The characteristics of selected studies

| Author /location                          | Study design                                                                 | Target behavior change                                                                  | Intervention tools and behavior change mechanisms                                     | Control tool                       | Primary measurement                                                                                | Retention rate                                                               | Results                                                                                                                                                                                                                                                                                                          |
|-------------------------------------------|------------------------------------------------------------------------------|-----------------------------------------------------------------------------------------|---------------------------------------------------------------------------------------|------------------------------------|----------------------------------------------------------------------------------------------------|------------------------------------------------------------------------------|------------------------------------------------------------------------------------------------------------------------------------------------------------------------------------------------------------------------------------------------------------------------------------------------------------------|
| <b>Mental health or Alcohol addiction</b> |                                                                              |                                                                                         |                                                                                       |                                    |                                                                                                    |                                                                              |                                                                                                                                                                                                                                                                                                                  |
| Ainsworth, J[31]<br>2013<br>UK            | RCT<br>19 days<br><br>N=24<br>Age:18-50yr<br>Participants with schizophrenia | Improving diagnostic real-time assessment score in patients with Serious mental illness | Smartphone app<br><br>1.real-time assessment                                          | Text messages                      | 1.Number of data points<br>2.Time took to complete assessment<br>3.Patients' quantitative feedback | 100% (12/12) in both groups                                                  | 1.Significant greater number of data points in intervention group<br>2. Significantly less time to complete the assessment in app group<br>3. No significant differences in participants' quantitative feedback questionnaire scores about the acceptability and feasibility between the two delivery modalities |
| Watts, S[32]<br>2013<br>Australia         | RCT<br>3 months<br><br>N=35<br>Age:over 18yr with major depression           | Developing skills in coping sadness in patients with depression                         | App- based The Sadness Program<br><br>1.cognitive behavioral therapy<br>2.self-report | Computer-based The Sadness Program | PHQ-9                                                                                              | 1. 60% (9/15) in intervention group<br><br>2. 46.7% (14/30) in control group | Both the Mobile and Computer Groups were associated with statistically significant benefits in the PHQ-9 score at post-test. At 3 months follow up, the reduction seen for both groups remained significant                                                                                                      |

### Multimedia Appendix 3: The characteristics of selected studies

|                                 |                                                                                                                              |                                                               |                                                                                                         |                                           |                                                                                     |                                                                                                |                                                                                                                                                                                                                                                                                                                                   |
|---------------------------------|------------------------------------------------------------------------------------------------------------------------------|---------------------------------------------------------------|---------------------------------------------------------------------------------------------------------|-------------------------------------------|-------------------------------------------------------------------------------------|------------------------------------------------------------------------------------------------|-----------------------------------------------------------------------------------------------------------------------------------------------------------------------------------------------------------------------------------------------------------------------------------------------------------------------------------|
| Ly, K. H[33]<br>2014<br>Sweden  | RCT<br>8weeks and 6<br>months follow<br>up<br><br>N=81<br>Mean age 36yr<br>diagnosed<br>with major<br>depressive<br>disorder | Increasing daily<br>activation in patients<br>with depression | Behavioral<br>activation app<br><br>1.based on<br>behavioral<br>activation therapy                      | Mindfulness<br>app                        | PHQ-9 and BDI-II                                                                    | 1. 77.5%<br>(31/40) in<br>intervention<br>group<br><br>2. 70.7%<br>(29/41)<br>in control group | 1. The two interventions did<br>not differ significantly from<br>one another<br>2. For participants with higher<br>severity of depression, the<br>treatment based on<br>intervention app was superior<br>3. For participants with lower<br>initial severity, the treatment<br>based on control app worked<br>significantly better |
| Villani, D[34]<br>2013<br>Italy | RCT<br>4weeks and<br>3moths<br>follow-up<br><br>N=30<br>Female<br>oncology<br>nurses                                         | Improving coping of<br>stress related anxiety                 | Mobile app- The<br>stress inoculation<br>training<br><br>1.cognitive<br>behavior therapy<br>2.self-help | Neutral video<br>through<br>mobile phones | 1.Anxiety level<br>2. Work<br>components 3.<br>Perceived stress<br>4. Coping skills | Not mentioned                                                                                  | 1.Results showed a significant<br>decrease in anxiety among<br>intervention group<br>2. A significant improvement<br>in affective change in terms of<br>anxiety trait reduction and<br>coping skills acquisition                                                                                                                  |

Multimedia Appendix 3: The characteristics of selected studies

|                                        |                                                                                                                          |                                     |                                                                                                                                                                                         |                                                             |                                                                                                   |                                                                                                                                             |                                                                                                                                                                                                   |
|----------------------------------------|--------------------------------------------------------------------------------------------------------------------------|-------------------------------------|-----------------------------------------------------------------------------------------------------------------------------------------------------------------------------------------|-------------------------------------------------------------|---------------------------------------------------------------------------------------------------|---------------------------------------------------------------------------------------------------------------------------------------------|---------------------------------------------------------------------------------------------------------------------------------------------------------------------------------------------------|
| Gustafson, D. H[27] 2014 United States | RCT<br>8 months intervention,<br>4 months follow-up<br><br>N= 349 adults meet the criteria for DSM-IV alcohol dependence | Reducing alcohol addiction          | ACHESS app + usual care<br><br>1.based on self-determination theory<br>2.peer support groups, communication addiction experts<br>3.self-monitoring<br>4.reminders                       | Usual care                                                  | Risky drinking days                                                                               | 1. 77.7% (132/170) in intervention group<br><br>2. 77.6% (139/179) in control group                                                         | Intervention group had significantly fewer risky drinking days than patients in the control group                                                                                                 |
| Gajecki, M[28] 2014 Sweden             | 3 arms RCT<br>7 weeks<br><br>N=1932 Uni students in risky alcohol consumption<br>Mean age: 24.7yr                        | Reducing problematic alcohol intake | Intervention1.Smartphone App: (Promillekoll)<br><br>1.based on theory of planned behavior<br>2.self-monitoring<br>3.feedback provide<br><br>Intervention2. web-based app (PartyPlanner) | Not receive any intervention or feedback on risky drinking  | 1.Calculating<br>2. Displaying an individual's eBAC                                               | 1. App intervention group: 73.6% (473/643)<br><br>2. Web-based intervention group: 60.9% (388/640)<br><br>3. Control group: 66.4% (500/649) | 1.The apps studied using eBAC calculation did not seem to affect alcohol consumption among university students<br>2. One app (Promillekoll) may have led to a negative effect among men           |
| Gonzalez. M[35] 2015 United States     | RCT<br>6 weeks<br><br>N=54 Age:18- 45yr with an alcohol use disorder                                                     | Decreasing alcohol use disorders    | APP: LBMI-A<br><br>1.based on Motivational enhancement therapy                                                                                                                          | Internet-based motivational intervention plus bibliotherapy | 1.Percent days abstinent (PDA)<br>2.Percent heavy drinking days (PHDD)<br>3.Drinks per week (DPW) | 1.100% (28/28) in intervention group<br><br>2. 76.9% (20/26) in control group.                                                              | 1.Multilevel models revealed that the LBMI-A resulted in a significant increase in PDA over the course of the study<br><br>2.Both interventions resulted in significant decreases in PHDD and DPW |

Multimedia Appendix 3: The characteristics of selected studies

| Physical activity, weight control and diet control |                                                                                                                                              |                                                                 |                                                                                                                                                                                                   |                                                                |                                                                                                           |                                                                                |                                                                                                                                                                                                              |
|----------------------------------------------------|----------------------------------------------------------------------------------------------------------------------------------------------|-----------------------------------------------------------------|---------------------------------------------------------------------------------------------------------------------------------------------------------------------------------------------------|----------------------------------------------------------------|-----------------------------------------------------------------------------------------------------------|--------------------------------------------------------------------------------|--------------------------------------------------------------------------------------------------------------------------------------------------------------------------------------------------------------|
| Rabbi, M[36]<br>2015<br>United States              | RCT<br>3weeks<br><br>N=17<br>Age:18-49yr                                                                                                     | Increasing physical activity and adopting healthy diet          | App: MyBehavior<br><br>1.based on contemporary behavioral science theories: (learning theory, social cognitive theory and the Fogg Behavior Model)<br>2.personalized feedback<br>3. Self-tracking | Non-personalized, generic suggestions created by professionals | 1.Food (calories in per meal consumed)<br><br>2.Activity (walking, running or exercise durations per day) | 100% (9/9) in both groups                                                      | 1.MyBehavior users walked significantly more than the control group<br>2. Users rated app's personalized suggestions more positively than the non-personalized, generic suggestions created by professionals |
| Laing, B. Y[29]<br>2014<br>United States           | RCT<br>6months<br><br>N=212<br>Primary care patients with BMI >=25 kg/m2<br>Interested in weight loss                                        | Increasing calorie counts                                       | MyFitnessPal app +usual care<br><br>1.based on social cognitive theory,<br>2.self-monitoring,<br>3.self-reminder<br>4.goal setting,<br>5.feedback.<br>6.social networking                         | Usual care                                                     | Weight loss                                                                                               | 1. 74% (78 /105) in intervention group<br><br>2. 79% (85/107) in control group | Weight change was minimal, with no difference between groups.                                                                                                                                                |
| Lee, W[26]<br>2010<br>Korea                        | Case-control<br>6weeks<br><br>N=36<br>Mean age:29.5 yr<br><br>All voluntary participants from the obese clinic at the fitness center in Soul | 1.Increasing nutrition knowledge<br><br>2.Better Weight control | Mobile-phone based app (SmartDiet)<br><br>1.personalized nutrition information<br>2.self-recording<br>3.goal setting                                                                              | Normal care                                                    | 1.Fat mass<br>2.Weight<br>3.BMI                                                                           | Not mentioned                                                                  | Fat mass, Weight, Fat mass and BMI decreased significantly in the intervention group, but no significant changes in the control group;                                                                       |

### Multimedia Appendix 3: The characteristics of selected studies

|                                         |                                                                                           |                                                                    |                                                                                                                                                                                                        |                                                                                             |                                                                                       |                                                                                 |                                                                                                                                                                                                                                                                                                                                                        |
|-----------------------------------------|-------------------------------------------------------------------------------------------|--------------------------------------------------------------------|--------------------------------------------------------------------------------------------------------------------------------------------------------------------------------------------------------|---------------------------------------------------------------------------------------------|---------------------------------------------------------------------------------------|---------------------------------------------------------------------------------|--------------------------------------------------------------------------------------------------------------------------------------------------------------------------------------------------------------------------------------------------------------------------------------------------------------------------------------------------------|
| Carter C[43]<br>2013<br>UK              | 3 arms RCT<br>6months<br><br>N=128<br>overweight<br>volunteers<br>Age: 18-65yr,<br>BMI>27 | Increasing<br>physical<br>activity and<br>adopting<br>healthy diet | Smartphone app + text-<br>message feedback<br><br>My Meal Mate (MMM)<br>1.evidence-based<br>behavioral approach<br>2.goal setting,<br>3.self-monitoring<br>4.feedback tailored<br>weekly text messages | Control 1:<br>Paper food<br>diary<br><br>Control 2:<br>Online food<br>diary website         | Weight<br>BMI<br>Body fat                                                             | 1. 93% (40/43)<br>in app group<br><br>2. 55% (19/42)<br>in the website<br>group | 1. Adherence was statistically<br>significantly higher in the<br>smartphone group with a mean<br>of 92 days (SD 67) of dietary<br>recording compared with 35<br>days (SD 44) in the website<br>group and 29 days (SD 39) in<br>the diary group.<br><br>2. Mean weight change, BMI<br>change and body fat change<br>were highest in smartphone<br>group |
| <b>Medication management</b>            |                                                                                           |                                                                    |                                                                                                                                                                                                        |                                                                                             |                                                                                       |                                                                                 |                                                                                                                                                                                                                                                                                                                                                        |
| Perera, A. I[37]<br>2014<br>New Zealand | RCT<br>3months<br><br>N=28<br>Adults on<br>ART for at<br>least 6 months                   | Improving<br>adherence to<br>antiretroviral<br>therapy<br>(ART).   | Augmented version of<br>the smartphone app<br><br>1.real-time information<br>provided<br>2. 24 hour timer<br>reminding<br>3.feed-back                                                                  | Standard<br>version of the<br>smartphone<br>app<br><br>1.Only 24<br>hour timer<br>reminding | 1.Self-reported<br>adherence to ART<br>2.Viral load<br>3. Pharmacy<br>dispensing      | Not mentioned                                                                   | 1.Intervention group showed a<br>significantly higher level of<br>self-reported adherence to ART<br>at 3 months and decreased viral<br>load as compared to<br>individuals using the standard<br>version<br>2. No significant differences of<br>pharmacy dispensing between<br>two groups                                                               |
| Mira, J.J[38]<br>2014<br>Spain          | RCT<br>3months<br><br>N=99<br>Age:65-90yr<br>Patients taking<br>multiple<br>medications   | Reducing non-<br>adherence and<br>medication<br>errors             | Pillbox App (ALICE)<br><br>1.medication self-<br>management<br>2.personalized advice<br>3.self-monitoring                                                                                              | Oral and<br>written<br>information on<br>the safe use of<br>their<br>medications            | 1.Morisky<br>Medication<br>Adherence Scale<br>(MMAS-4)<br>2. Safety<br>medication use | 100%<br>(48/48,51/51) in<br>both groups                                         | 1. Patients with no experience<br>with information and<br>communication technologies<br>reported significantly better<br>adherence and fewer missed<br>doses<br>2. ALICE only helped to<br>significantly reduce medication<br>errors in patients with an<br>initially higher rate of errors                                                            |

### Multimedia Appendix 3: The characteristics of selected studies

|                                          |                                                                                           |                                                                             |                                                                                                                                                                                                       |                                                  |                                                                                                                                                                                                          |                                                                                                                                |                                                                                                                                                                                                                                                                         |
|------------------------------------------|-------------------------------------------------------------------------------------------|-----------------------------------------------------------------------------|-------------------------------------------------------------------------------------------------------------------------------------------------------------------------------------------------------|--------------------------------------------------|----------------------------------------------------------------------------------------------------------------------------------------------------------------------------------------------------------|--------------------------------------------------------------------------------------------------------------------------------|-------------------------------------------------------------------------------------------------------------------------------------------------------------------------------------------------------------------------------------------------------------------------|
| Hammonds, T[39] 2015<br>United States    | RCT<br>30days<br><br>N=57 College students<br>Age:18-30yr<br>Prescribed an antidepressant | Increasing adherence to antidepressant medications                          | A medication reminder app + a manual pill count<br><br>1.self-reminder<br>2.self-monitoring                                                                                                           | A manual pill count                              | 1.Medication adherence<br><br>2. The Beck Depression Inventory (BDI) scores                                                                                                                              | 1. 67% (20/30) in the treatment group<br><br>2. 74 % (20/27) participants in the control group                                 | 1. There was a strong trend suggesting that the use of a medication reminder app was beneficial for adherence to antidepressant medication regimens.<br>2. The magnitude of change in depression symptoms was not greater in the experimental group                     |
| <b>Lifestyle improvement</b>             |                                                                                           |                                                                             |                                                                                                                                                                                                       |                                                  |                                                                                                                                                                                                          |                                                                                                                                |                                                                                                                                                                                                                                                                         |
| Van Drongelen, A[30] 2014<br>Netherlands | RCT<br>6months<br>N= 502 airline pilots                                                   | 1.Adopting health-related behavior<br>2.Reducing sleep problems and fatigue | App (MORE Energy)<br><br>1.personal advice<br>2.general information<br>3.reminders                                                                                                                    | Website with standard information about fatigue. | 1.Fatigue<br>2.Sleep quality health-related behavior and health                                                                                                                                          | 1.Intervention group:79.3% (199/251)<br><br>2.Control group:76% (191/251)                                                      | Intervention group showed a significant improvement on fatigue, sleep quality, strenuous physical activity and snacking behavior                                                                                                                                        |
| Van het Reve, E[40] 2014<br>Switzerland  | 3 arms RCT<br>12 weeks<br>N=48 older than 65yr                                            | 1.Improving gait quality<br><br>2.Improving physical performance            | Social: Tablet app (ActiveLifestyle) social group added<br><br>Individual: tablet app(ActiveLifestyle)<br><br>1. provide instruction on how to perform behavior<br>2.self- monitors<br>3.goal setting | A training plan on paper sheets                  | 1.Gait performance under single and dual task conditions<br>2.Dual task costs of walking<br>3.Falls efficacy<br>4.Physical performance (SPPB scores)<br>5.The Falls Efficacy Scale International (FES-I) | 1. 78.6% (11/14) in the social group<br><br>2. 84.6% (11/13) in the individual group.<br><br>3. 58.8% (10/17) in control group | 1. The individual group was significantly faster in gait speed than the control group<br><br>2. The individual group was faster than the social group though not statistically significant.<br><br>3. Social or individual motivation strategies were equally effective |

### Multimedia Appendix 3: The characteristics of selected studies

| <b>Diabetes management</b>               |                                                                                                                                                                         |                                                                                                     |                                                                                                                                                                         |                        |                                                                                                                                        |                                                                                                  |                                                                                                                                                                                                                                            |
|------------------------------------------|-------------------------------------------------------------------------------------------------------------------------------------------------------------------------|-----------------------------------------------------------------------------------------------------|-------------------------------------------------------------------------------------------------------------------------------------------------------------------------|------------------------|----------------------------------------------------------------------------------------------------------------------------------------|--------------------------------------------------------------------------------------------------|--------------------------------------------------------------------------------------------------------------------------------------------------------------------------------------------------------------------------------------------|
| Kirwan, M[41]<br>2013<br>Australia       | RCT<br>6-month<br>intervention,<br>3 month<br>follow-up<br><br>N=72<br>Mean age:<br>35.20yr<br><br>Mean year of<br>diagnosed<br>with type 1<br>diabetes:<br>18.94 years | Improving glycemic<br>control                                                                       | Smartphone app<br>(Glucose Buddy)<br>+ text-message<br>feedback<br><br>1.self-monitoring<br>2.self-<br>management<br>3.weekly<br>personalized text-<br>message feedback | Usual care             | 1.HbA1c level<br><br>2.Blood test                                                                                                      | 1.Intervention<br>group: 69.4%<br>(25/36)<br><br>2.Control group:<br>77.8% (28/36)               | The intervention group<br>significantly improved<br>glycemic control (HbA1c)<br>from baseline to 9-month<br>follow-up, compared to the<br>control group.                                                                                   |
| <b>Sun protection</b>                    |                                                                                                                                                                         |                                                                                                     |                                                                                                                                                                         |                        |                                                                                                                                        |                                                                                                  |                                                                                                                                                                                                                                            |
| Buller, D.B[11]<br>2015<br>United States | RCT<br>3weeks<br>intervention,<br>3weeks and<br>8weeks<br>follow-up<br><br>N=202 adults                                                                                 | 1.Increasing use of<br>sun protection<br><br>2.Reducing time<br>spent outdoors in the<br>midday sun | Smartphone app<br>(Solar Cell)<br><br>1.delivering<br>advice<br>2.feedback<br>3.provide<br>information<br>4.self-efficacy                                               | Not receive<br>any app | 1. Percentage of<br>days with the use of<br>sun protection<br>2.Time spent<br>outdoors in the<br>midday sun<br>3.Number of<br>sunburns | 1. 92.7%<br>(89/96)<br>in intervention<br>group<br><br>2. 98.1%<br>(104/106) in<br>control group | Intervention group used wide-<br>brimmed hats more at 7 weeks<br>than control participants                                                                                                                                                 |
| <b>Hypertension management</b>           |                                                                                                                                                                         |                                                                                                     |                                                                                                                                                                         |                        |                                                                                                                                        |                                                                                                  |                                                                                                                                                                                                                                            |
| Moore, J. O[42]<br>2014<br>United States | RCT<br>12 weeks<br><br>N=44<br>Adults with<br>uncontrolled<br>essential<br>hypertension                                                                                 | Improving<br>hypertension<br>management                                                             | CollaboRhythm app<br>on a tablet<br><br>1.self-track<br>2.personalized<br>feedback<br>3.self-monitoring                                                                 | Traditional<br>care    | 1.Medication<br>adherence<br>2.Blood pressure<br>(BP)                                                                                  | 1.96.5%(22/23)<br>in intervention<br>group<br><br>2.95.2%(20/21) in<br>control group             | 1. Intervention subjects<br>achieved significant decrease<br>in systolic BP at 12 weeks<br>than control subjects.<br>2.A greater percentage of<br>intervention subjects achieved<br>goal BP ≤ 130/80 mm Hg<br>3.100% of them achieved goal |

BP ≤ 140/90 mmHg.

| <b>Cardiac rehabilitation</b>              |                                                                                                                     |                                                                             |                                                                                                                                                                       |                                                              |                                                                                    |                                                                            |                                                                                                                                                                                                          |
|--------------------------------------------|---------------------------------------------------------------------------------------------------------------------|-----------------------------------------------------------------------------|-----------------------------------------------------------------------------------------------------------------------------------------------------------------------|--------------------------------------------------------------|------------------------------------------------------------------------------------|----------------------------------------------------------------------------|----------------------------------------------------------------------------------------------------------------------------------------------------------------------------------------------------------|
| Varnfield, M[44]<br>2014<br>Australia      | RCT<br>6-week intervention and 6-month self-maintenance period.<br><br>N=120<br>Post-myocardial infarction patients | Improving cardiac rehabilitation use in post-myocardial infarction patients | A smartphone-based home service delivery (apps+sms+teleph one consultation)<br><br>1.self-monitoring<br>2.uploading app data to web portal                            | A traditional, center based program                          | 1. 6-min walking test distance<br><br>2.Depression scores                          | 1.Intervention group: 76.7%(46/60)<br><br>2. Control group: 43.3%(26/60)   | 1. Intervention group had significantly higher uptake adherence and completion rates than control group.<br>2.Both groups showed significant improvements in 6-minute walk test from baseline to 6 weeks |
| <b>Smoking cessation</b>                   |                                                                                                                     |                                                                             |                                                                                                                                                                       |                                                              |                                                                                    |                                                                            |                                                                                                                                                                                                          |
| Bricker, J. B[45]<br>2014<br>United States | RCT<br>2months<br><br>N=196<br>At least five cigarettes daily for at least past 12 months                           | Reducing heavy smoking                                                      | An innovative app (SmartQuit)<br><br>1.acceptance and commitment therapy<br>2.self-monitoring<br>3.goal setting<br>4.self-tracking<br>5.social support<br>6.motivated | An app following US Clinical Practice Guidelines (QuitGuide) | 1.Participant satisfaction, utilization of the app<br>2.Smoking cessation outcomes | 1.Intervention group: 81.6% (80/98)<br><br>2. Control group: 85.7% (84/98) | 1. The overall quit rates were 13% in SmartQuit vs. 8% in QuitGuide<br><br>2. Promising quit rates compared to QuitGuide app                                                                             |



### Multimedia Appendix 3: The characteristics of selected studies

| Family planning                            |                                                                                                                   |                                                                                                                   |                                                                                                                                                                                                                             |               |                                                                                                                                             |                                                                                                                                                                   |                                                                                                                                                                                                     |
|--------------------------------------------|-------------------------------------------------------------------------------------------------------------------|-------------------------------------------------------------------------------------------------------------------|-----------------------------------------------------------------------------------------------------------------------------------------------------------------------------------------------------------------------------|---------------|---------------------------------------------------------------------------------------------------------------------------------------------|-------------------------------------------------------------------------------------------------------------------------------------------------------------------|-----------------------------------------------------------------------------------------------------------------------------------------------------------------------------------------------------|
| Gilliam ML[9]<br>2014<br>United States     | RCT<br>8months<br><br>N=60 women<br>under 30yr<br>old, median<br>age of 22.5yr                                    | Increasing women's<br>interests in up taking<br>long-acting reversible<br>contraceptive<br>(LARC)                 | App<br><br>1. based on the<br>theory of planned<br>behavior<br>2. general<br>information<br>3. instruction on<br>how to use                                                                                                 | Standard care | 1.Expressed interest<br>in discussing a<br>LARC method<br>during the clinic<br>visit.<br>2.Contraceptive<br>knowledge and<br>LARC selection | 1.Intervention<br>group: 90.3%<br>(28/31)<br><br>2.Control<br>group:77.4%<br>(24/31)                                                                              | App users had a significantly<br>higher knowledge of<br>contraceptive effectiveness<br>and increased interest in the<br>implant after the intervention                                              |
| Pain management                            |                                                                                                                   |                                                                                                                   |                                                                                                                                                                                                                             |               |                                                                                                                                             |                                                                                                                                                                   |                                                                                                                                                                                                     |
| Irvine,A<br>B[10]<br>2015<br>United States | RCT<br>8weeks<br>4months<br>follow-up<br><br>N=597 adults<br>suffered low<br>back pain in<br>previous 3<br>months | 1.Improving self-care<br>for on-going pain<br><br>2.Adopting behaviors<br>to reduce the chance<br>of reoccurrence | Group 1: FitBack<br>app<br><br>1. based on<br>Theory of<br>Planned Behavior<br>2. self-<br>management<br>intervention<br>3. self-monitoring<br>4. tailored<br>information<br><br>Group 2:<br>Alternative<br>Website Control | Usual care    | Change in<br>responses to the<br>Modified Oswestry<br>Low Back Pain<br>Disability<br>Questionnaire                                          | 1.App<br>intervention<br>group: 92.0%<br>(183/199)<br><br>2.Alternative<br>intervention<br>group:97.5%<br>(194/199)<br><br>3.Control group:<br>97.5%<br>(194/199) | Users of the FitBack program<br>showed significant<br>improvement compared to the<br>control group in every<br>comparison of the critical<br>physical, behavioral, and<br>worksite outcome measures |

ADHD: Attention Deficit Hyperactivity Disorder

BG: blood glucose

BP: blood press

BDI: Beck's Depression Inventory

BDI-II: Beck Depression Inventory-II

Depression Scale -PHQ-9: 9-item Patient Health Questionnaire

eBAC: individual's estimated blood alcohol concentration

EQ5D-3L: EuroQol Five Dimensional [EQ5D-3L] questionnaire

## Multimedia Appendix 3: The characteristics of selected studies

---

EBI: Eating Behaviors Inventory (EBI)

SPPB: Short Physical Performance Battery

SMS: Short Message Service

SSB: sugar sweetened beverages

SBP: Systolic blood pressure

TBP: theory-based podcast

PA: physical activity
