# Supplementary material for: Can Mobile Phone Apps Influence People’s Health Behavior Change? An Evidence Review
Source: PubMed Central journal article supplement (PMC5295827; doi:10.2196/jmir.5692), 2016-11-02
Supplement: jmir_v18i11e287_app4.pdf [file jmir_v18i11e287_app4.pdf]

## Multimedia Appendix 4: Study Quality Assessment

| <b>Trial</b>                                              | <b>Random sequence generation</b> | <b>Allocation concealment</b> | <b>Blinding of participants and personnel</b> | <b>Blinding of outcome assessment</b> | <b>Incomplete outcome data</b> | <b>Selective outcome reporting</b> | <b>Other bias</b> |
|-----------------------------------------------------------|-----------------------------------|-------------------------------|-----------------------------------------------|---------------------------------------|--------------------------------|------------------------------------|-------------------|
| <b>Mental health or Alcohol addiction</b>                 |                                   |                               |                                               |                                       |                                |                                    |                   |
| Ainsworth, J[31]<br>2013                                  | U                                 | L                             | U                                             | U                                     | L                              | L                                  | U                 |
| Watts, S[32]<br>2013                                      | L                                 | L                             | H                                             | H                                     | H                              | L                                  | H                 |
| Ly, K. H[33]<br>2014                                      | L                                 | L                             | H                                             | H                                     | H                              | L                                  | L                 |
| Villani, D[34]<br>2013                                    | U                                 | H                             | H                                             | H                                     | U                              | L                                  | U                 |
| Gustafson, D. H[27]<br>2014                               | L                                 | L                             | H                                             | H                                     | H                              | L                                  | U                 |
| Gajecki, M [28]<br>2014                                   | U                                 | L                             | H                                             | L                                     | H                              | L                                  | U                 |
| Gonzalez, M[35]<br>2015                                   | U                                 | U                             | H                                             | L                                     | L                              | L                                  | H                 |
| <b>Physical activity, weight control and diet control</b> |                                   |                               |                                               |                                       |                                |                                    |                   |
| Rabbi, M [36]<br>2015                                     | U                                 | U                             | L                                             | H                                     | L                              | U                                  | U                 |

## Multimedia Appendix 4: Study Quality Assessment

|                                    |   |   |   |   |   |   |   |
|------------------------------------|---|---|---|---|---|---|---|
| Laing,B.<br>Y[29]<br>2014          | L | L | H | H | H | L | L |
| Carter, C<br>[43]<br>2013          | L | L | H | H | L | L | U |
| <b>Medication management</b>       |   |   |   |   |   |   |   |
| Perera,A.<br>I[37]<br>2014         | U | U | U | U | U | H | U |
| Mira,<br>J.J[38]<br>2014           | U | U | H | L | L | H | U |
| Hammonds<br>, T[39]<br>2015        | U | U | H | H | H | L | L |
| <b>Lifestyle improvement</b>       |   |   |   |   |   |   |   |
| Van<br>Drongelen,<br>A[30]<br>2014 | L | U | H | H | H | H | H |
| Van het<br>Reve,<br>E[40]<br>2014  | U | U | U | U | H | H | U |
| <b>Diabetes management</b>         |   |   |   |   |   |   |   |
| Kirwan,<br>M[41]<br>2013           | H | L | H | H | H | L | L |
| <b>Sun protection</b>              |   |   |   |   |   |   |   |
| Buller,<br>D.B[11]<br>2015         | U | U | H | H | L | L | L |

## Multimedia Appendix 4: Study Quality Assessment

| <b>Hypertension management</b> |   |   |   |   |   |   |   |
|--------------------------------|---|---|---|---|---|---|---|
| Moore, J.<br>O[42]<br>2014     | U | L | U | U | L | L | H |
| <b>Cardiac rehabilitation</b>  |   |   |   |   |   |   |   |
| Varnfield,<br>M[44]<br>2014    | L | L | H | H | H | H | H |
| <b>Smoking cessation</b>       |   |   |   |   |   |   |   |
| Bricker, J.<br>B[45]<br>2014   | L | U | L | L | L | L | H |
| <b>Family planning</b>         |   |   |   |   |   |   |   |
| Gilliam<br>ML[9]<br>2014       | L | L | H | L | L | L | L |
| <b>Pain management</b>         |   |   |   |   |   |   |   |
| Irvine,A<br>B[10]<br>2015      | U | U | H | H | L | L | L |

L: low risk of bias

H: High risk of bias

U: unclear risk of bias
